# Supplementary material
Source: PubMed Central journal article supplement (PMC2077261)

(A) constitutive activity of AMPK with H150R  $\gamma$ 1 subunit

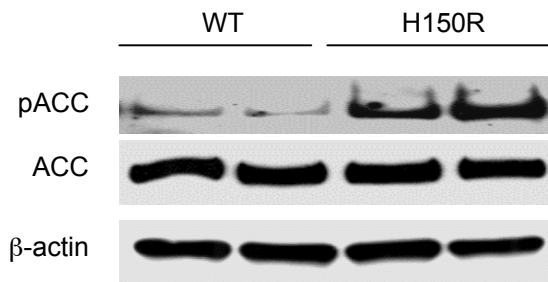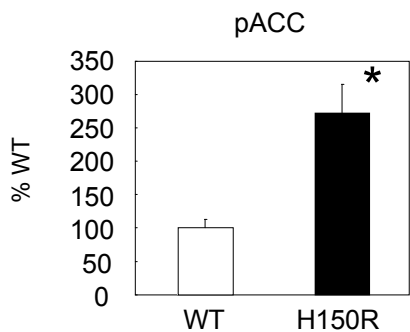

(B) expression of hemagglutinin (HA) tag of CA-AMPK in dissected hypothalamic regions

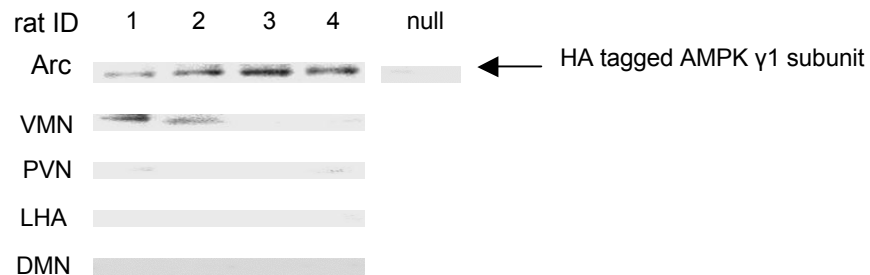

(C) daily food intake after injection of adenovirus

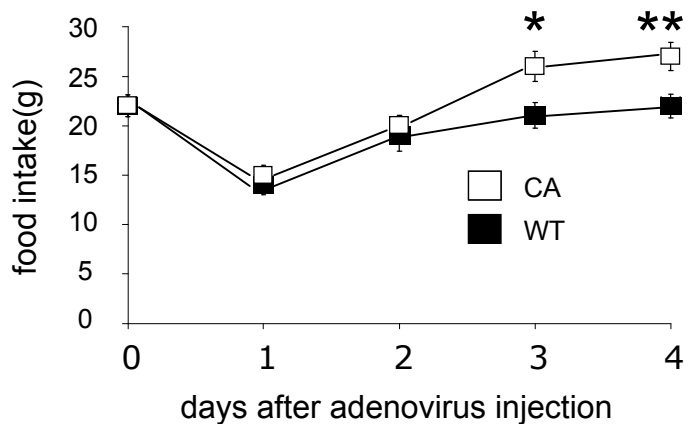

(D) body weight change after injection of adenovirus

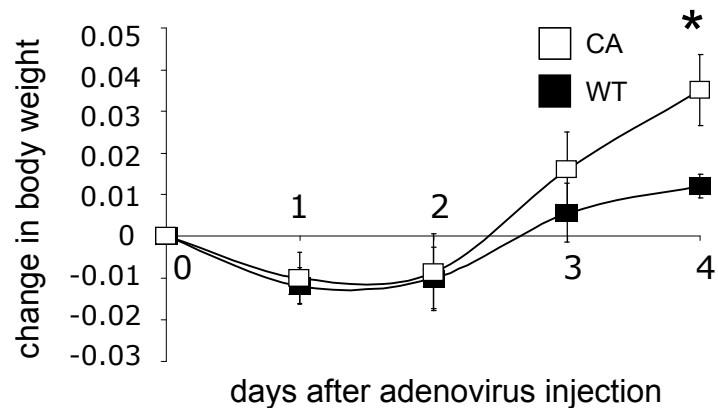

Supplement: pnas_0708385104_2.pdf [file pnas_0708385104_2.pdf]
