# Supplementary material
Source: PubMed Central journal article supplement (PMC2077261)

(A) standard curve for malonyl-CoA recycling assay

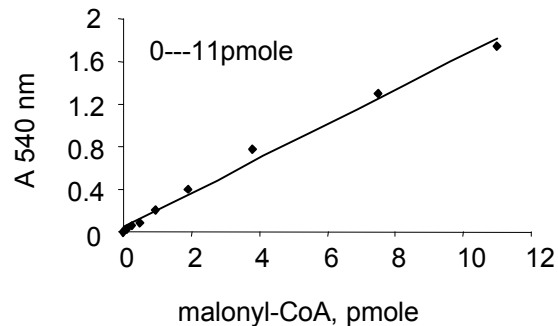

(B) refeeding increases liver malonyl-CoA level

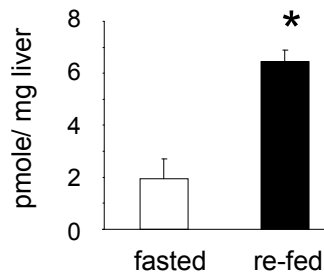

(C) ICV infusion of TOFA decreases hypothalamic malonyl-CoA level

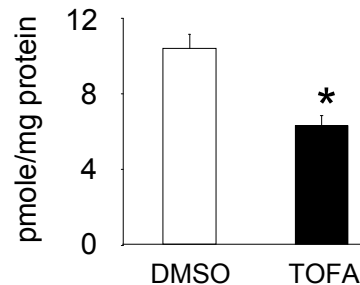

(D) blood glucose levels

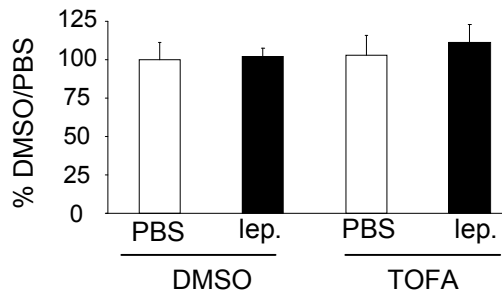

(E) LHA malonyl-CoA levels, 3hr

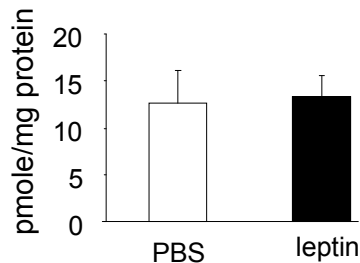

(F) LHA LCFA-CoA levels, 3hr

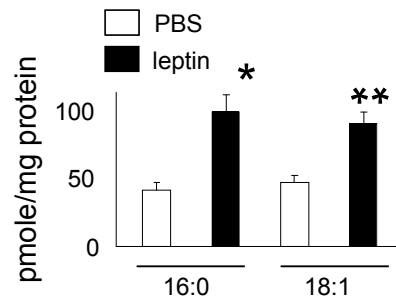

Supplement: pnas_0708385104_3.pdf [file pnas_0708385104_3.pdf]
