# Supplementary material
Source: PubMed Central journal article supplement (PMC2077261)

(A) body weight change in response to ICV infusion of DMSO/TOFA

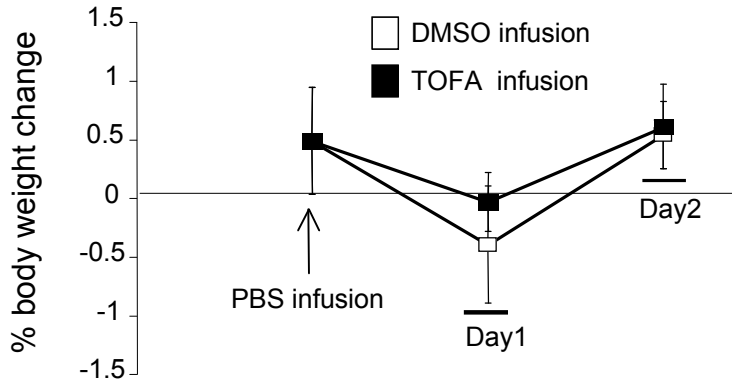

(B) food intake in response to ICV infusion of DMSO/TOFA

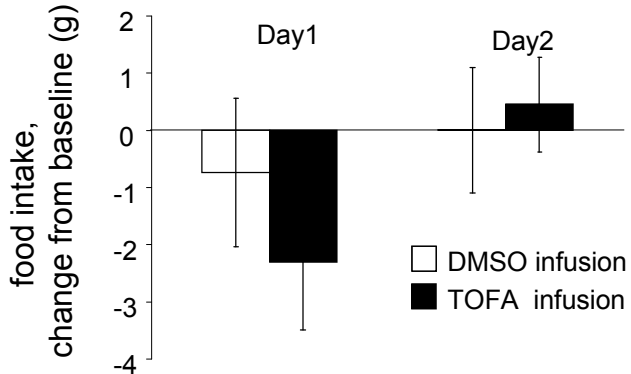

Supplement: pnas_0708385104_4.pdf [file pnas_0708385104_4.pdf]
