# Supplementary material
Source: PubMed Central journal article supplement (PMC2077261)
Supplement: pnas_0708385104_5.pdf [file pnas_0708385104_5.pdf]

(A) mRNA levels of neuropeptides in dissected hypothalamic regions

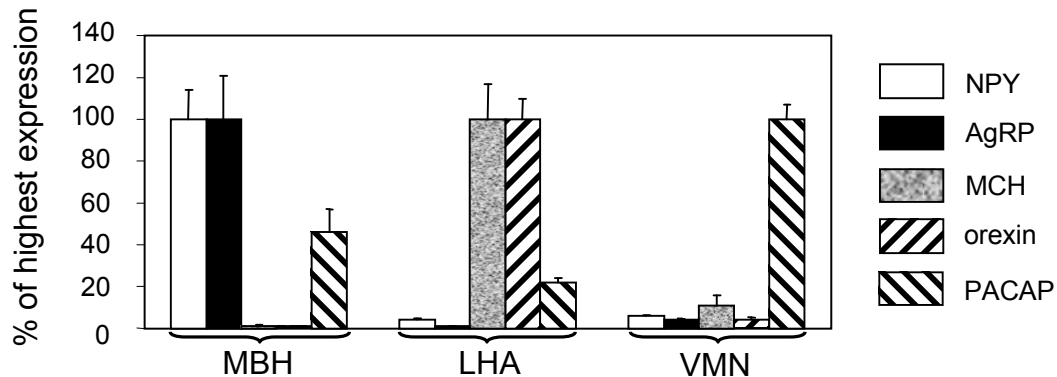

(B) sequences of the primers:

NPY: forward: AGAGATCCAGCCCTGAGACA; reverse: AACGACAACAAGGGAAATGG  
AgRP: forward: TGGCAGAGGTGCTAGATCCA; reverse: GCACAGGTCGCAGCAAGGTA  
MCH: forward: TCGGTTGTTGCTCCTTCTCT; reverse: TTCCCTCTTTTCTGTGTGG  
orexin: forward: ACCACTGCACCGAAGATAACC; reverse: AGTTCGTAGAGACGGCAGGA  
PACAP: forward: AACCCGCTGCAAGACTTCTA; reverse: GGTCCAAGACTTTGCGGTAG
