# Supplementary material
Source: PubMed Central journal article supplement (PMC2077261)
Supplement: pnas_0708385104_6.pdf [file pnas_0708385104_6.pdf]

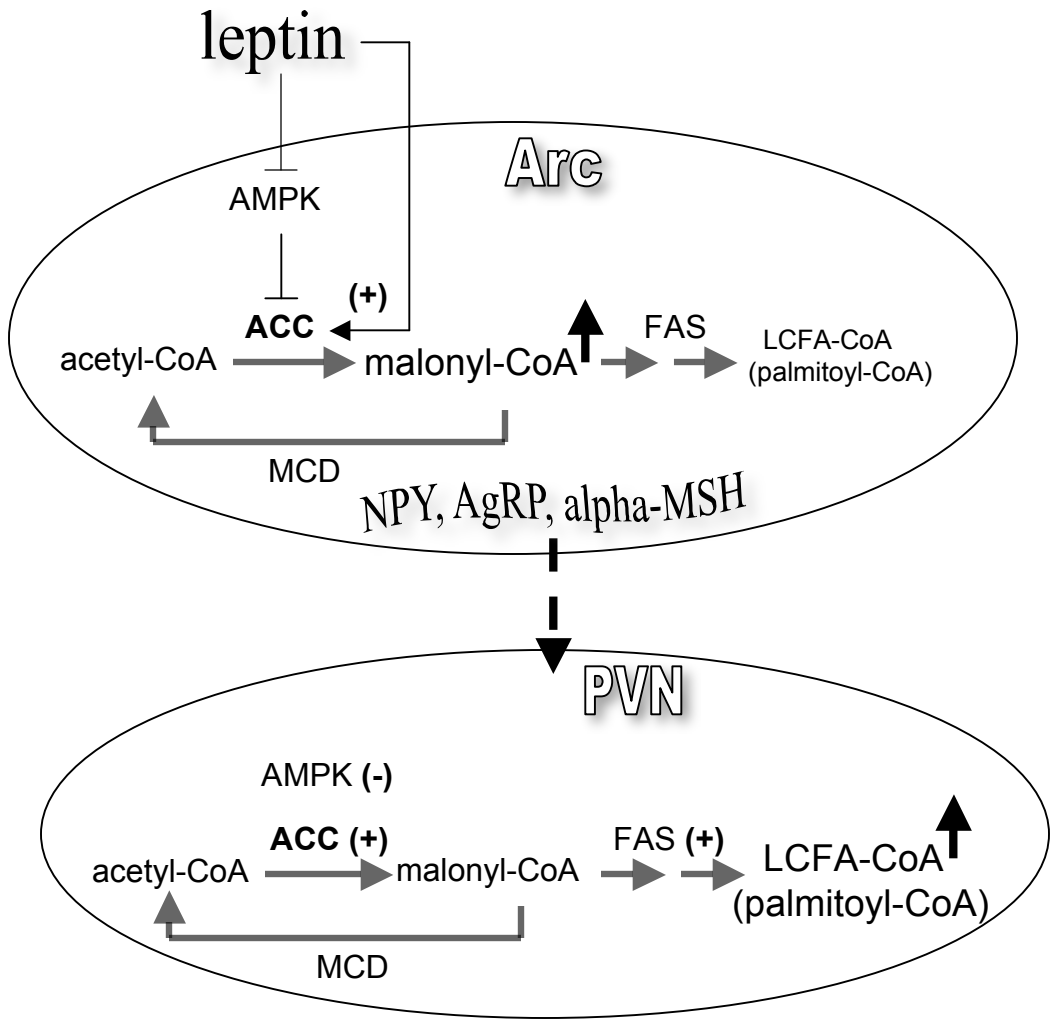

—| and - : inhibit  
 + : activate

AMPK: AMP-activated protein kinase  
 ACC: acetyl-CoA carboxylase  
 FAS: fatty acid synthase  
 MCD: malonyl-CoA decarboxylase
