# Supplementary material
Source: PubMed Central journal article supplement (PMC2077261)

phospho-ACC  $\beta$  (pACC  $\beta$ )

MBH (Arc)

PVN

PBS

leptin

PBS

leptin

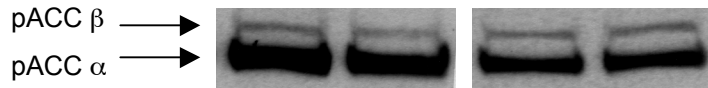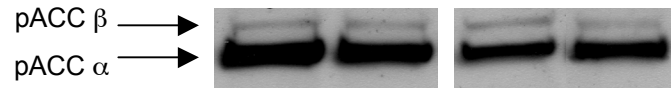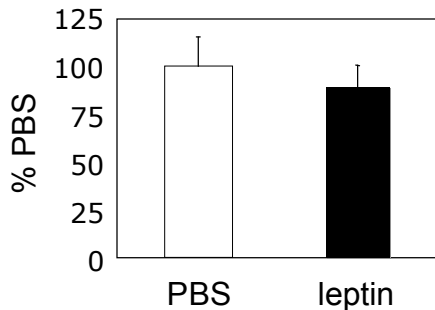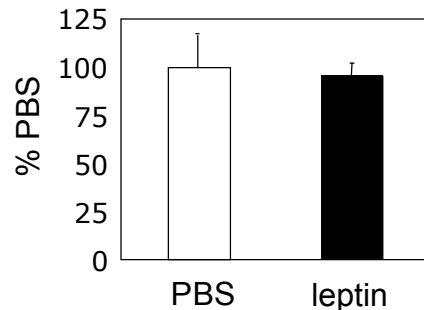

Supplement: pnas_0708385104_1.pdf [file pnas_0708385104_1.pdf]
